# Supplementary material for: LINE-1 couples EMT programming with acquisition of oncogenic phenotypes in human bronchial epithelial cells
Source: PubMed Central journal article supplement (PMC5732769; doi:10.18632/oncotarget.21953), 2017-10-23
Supplement: oncotarget-08-103828-s001.pdf [file oncotarget-08-103828-s001.pdf]

## LINE-1 couples EMT programming with acquisition of oncogenic phenotypes in human bronchial epithelial cells

### SUPPLEMENTARY MATERIALS

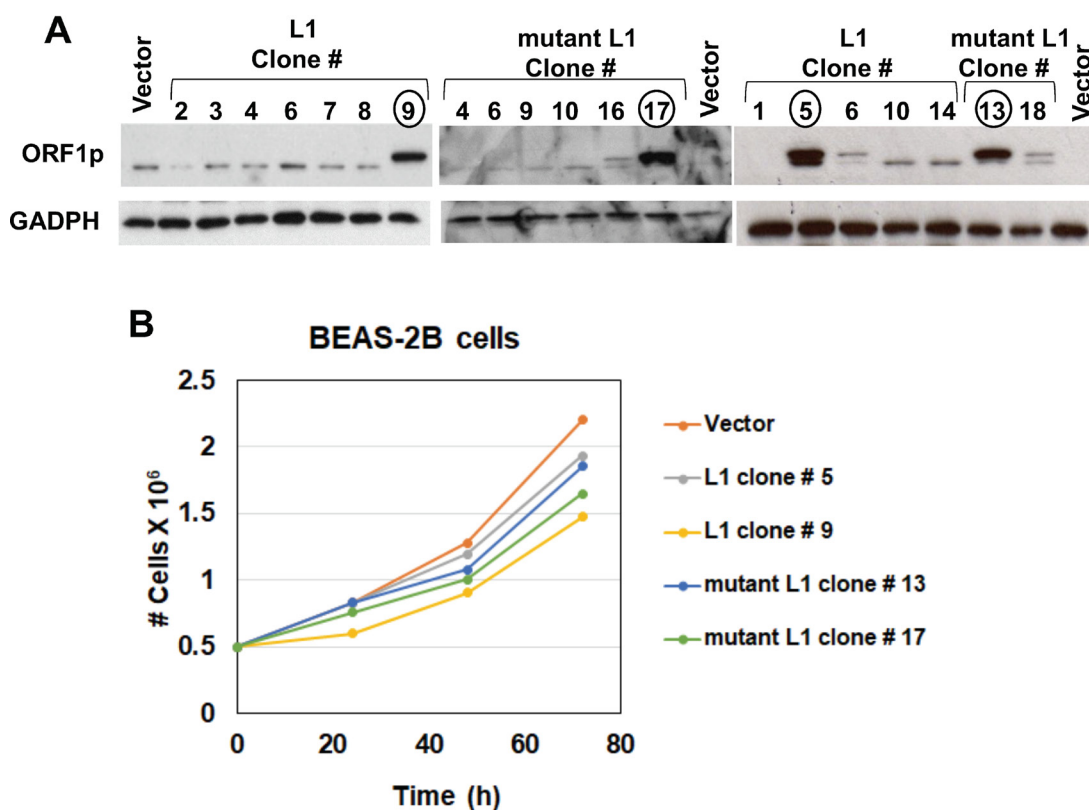

**Supplementary Figure 1: ORF1 protein expression and growth kinetics under basal conditions in BEAS-2B clones constitutively expressing wild type or mutant LINE-1.** BEAS-2B cells were stably transfected with wild type LINE-1 (L1); a mutant LINE-1 counterpart lacking reverse transcriptase activity (mutant L1) or empty vector and selected under pressure with hygromycin as described in Methods. (A) Immunoblotting of whole cell lysates from individual clones using antibodies against LINE1-ORF1 protein or GAPDH as control. (B) BEAS-2B clones #5, 9, 13, and 17 (50,000 cells) were plated in 6-well plates at time 0 and growth kinetics monitored at 24, 48, and 72 hr. Cells were harvested and counted to quantify cell proliferation. Clones #5 and 9 represent cells transfected with wild type LINE-1, while clones # 13 and 17 represent cells transfected with mutant L1.

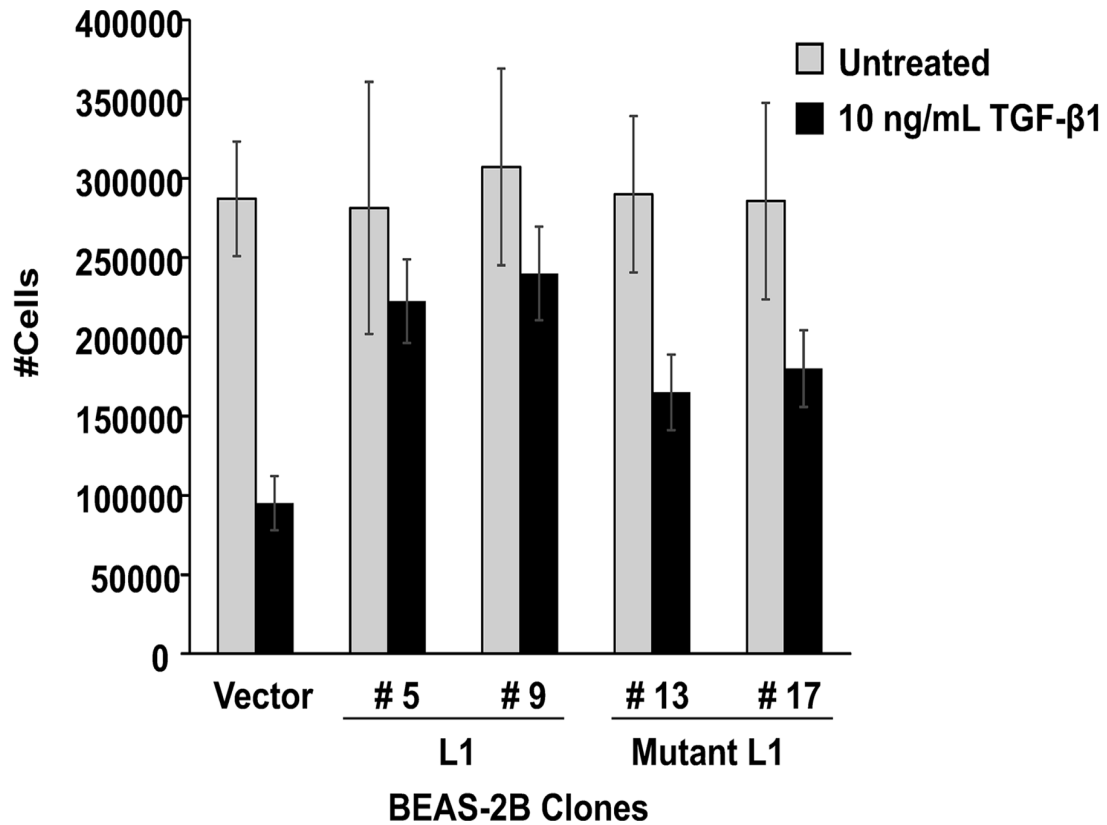

**Supplementary Figure 2: Inhibition of TGF- $\beta$ 1 Anti-proliferative Activity in BEAS-2B clones constitutively expressing wild type or mutant LINE-1.** Selected BEAS2-B clones (50,000 cells per replicate) were plated in 6-well plates one day before treatment. Cells were challenged directly with 10 ng/mL TGF- $\beta$ 1 and cell numbers measured after 72 hr. Clones #5 and 9 represent cells transfected with wild type LINE-1, while clones # 13 and 17 represent cells transfected with mutant L1. Proliferation was compared to clones transfected with empty vector.
